# Supplementary material for: 4-Hydroxy-2-nonenal antimicrobial toxicity is neutralized by an intracellular pathogen
Source: eLife. 2021 May 6;10:e59295. doi: 10.7554/eLife.59295 (PMC8174450; doi:10.7554/eLife.59295)
Supplement: Supplementary file 1. [file elife-59295-supp1.xlsx]

## Sheet: Sheet1
	Bacterial strains used in this study
	Strain	Strain number	Description	Reference/Source
	WT Lm	JW006	Listeria monocytogenes 10403s	Portnoy Lab (Berkeley, CA)
	WT Bs	JW227	Bacillus subtilis 168 trpC2 pheA1	Merrikh Lab (Nashville, TN)
	WT Fn	JW700	Francisella novicida U112	Mougous Lab (Seattle, WA)
	WT Pa	JW629	Pseudomonas aeruginosa PAO1	Parsek Lab (Seattle, WA)
	WT Sa	JW197	Staphylococcus aureus spp Newman	Reniere Lab (Seattle, WA)
	WT Ef	JW659	Enterococcus faecalis OG1RF	Mougous Lab (Seattle, WA)
	DH10B Ec	JW603	Escherichia coli DH10B	Lagunoff Lab (Seattle, WA)
	SM10 Ec	JW657	Escherichia coli SM10	Portnoy Lab (Berkeley, CA)
	BL21 Ec	JW658	Escherichia coli BL21	Marletta Lab (Berkeley CA)
	Rosetta Ec	JW030	Escherichia coli Rosetta	Marletta Lab (Berkeley CA)
	Lm marked strain	JW540	L. monocytogenes marked strain DP-L3903	Portnoy Lab (Berkeley, CA)
	Lm GFP	JW317	background of DP-L4056 (phage-cured 10403s) integrated with pPL1077 (pPL1-bGFP)	Portnoy Lab (Berkeley, CA)
	Lm ∆rha1	JW674	L. monocytogenes clean deletion of rha1 (lmo0103)	this study
	Lm ∆rha1::rha1	JW675	L. monocytogenes clean deletion of rha1 complemented with integrated pPL2-Pspac-rha1 plasmid	this study
	Lm ∆rha2	JW676	L. monocytogenes clean deletion of rha2 (lmo0613)	this study
	Lm ∆rha2::rha2	JW677	L. monocytogenes clean deletion of rha2 complemented with integrated pPL2-Pspac-rha2 plasmid	this study
	Lm ∆rha1∆rha2	JW678	L. monocytogenes clean deletions of rha1 and rha2	this study
	Lm ∆rha1∆rha2::rha1	JW679	L. monocytogenes clean deletions of rha1 and rha2 complemented with integrated pPL2-Pspac-rha1 plasmid	this study
	Lm ∆rha1∆rha2::rha2	JW680	L. monocytogenes clean deletions of rha1 and rha2 complemented with integrated pPL2-Pspac-rha2 plasmid	this study
	Bs pHT01::rha1_WT	JW681	B. subtilis containing pHT01::rha1 WT ORF	this study
	Bs pHT01::rha1_N47A	JW682	B. subtilis containing pHT01::rha1 N47A ORF	this study
	Bs pHT01::rha2_WT	JW683	B. subtilis containing pHT01::rha2 WT ORF	this study
	Bs pHT01::rha2_Y195A	JW684	B. subtilis containing pHT01::rha2 Y195A ORF	this study
	Bs pHT01::rha1/2_WT	JW685	B. subtilis containing pHT01::rha1/2 WT ORFs	this study
	Bs pHT01::rha1/2_MUT	JW686	B. subtilis containing pHT01::rha1/2 MUT ORFs	this study
