# Supplementary material for: 4-Hydroxy-2-nonenal antimicrobial toxicity is neutralized by an intracellular pathogen
Source: eLife. 2021 May 6;10:e59295. doi: 10.7554/eLife.59295 (PMC8174450; doi:10.7554/eLife.59295)
Supplement: Supplementary file 2. [file elife-59295-supp2.xlsx]

## Sheet: Sheet1
	Plasmids used in this study
	Strain #	E. coli background	Plasmid	Description	Source
	JW321	SM10	pPL1077	pPL1 integrative plasmid for constitutive GFP expression under pHyper promoter	Peter Lauer (Berkeley, CA)
	JW581	DH10B	pKSV7	oriT containing temperature sensitive integrative shuttle vector. Amp in Ec, Chlor in Lm	Portnoy Lab (Berkeley, CA)
	JW638	XL1Blue	pPL2-Pspac	integrative plasmid pPL2 engineered with constitutive Pspac promoter. Chlor in Ec and Lm	Huynh et al, 2015
	JW656	DH5a	pHT01	IPTG-inducible expression plasmid for Bs. Driven off Pgrac promoter. Amp in Ec, Chlor in Bs	Merrikh Lab (Nashville, TN)
	JW009	XL1Blue	pET20b	IPTG-inducible expression plasmid for Ec with C-terminus 6xHis tag. Driven off T7 promoter. Amp in Ec	Marletta Lab (Berkeley, CA)
	JW137	XL1Blue	pET28b	IPTG-inducible expression plasmid for Ec with N-terminus 6xHis tag. Driven off T7 promoter. Kan in Ec	Marletta Lab (Berkeley, CA)
	JW660	SM10	pKSV7::rha1_KO	for generating clean gene disruption of rha1 (lmo0103) gene	this study
	JW661	SM10	pKSV7::rha2_KO	for generating clean gene disruption of rha2 (lmo0613) gene	this study
	JW662	SM10	pPL2-Pspac::rha1	integrative plasmid pPL2 with constitutive Pspac promoter expressing rha1	this study
	JW663	SM10	pPL2-Pspac::rha2	integrative plasmid pPL2 with constitutive Pspac promoter expressing rha2	this study
	JW664	BL21	pET20B::rha1_WT	rha1 WT ORF under T7 promoter with C-terminus 6xHis tag	this study
	JW665	BL21	pET20B::rha1_N47A	rha1 N47A ORF under T7 promoter with C-terminus 6xHis tag	this study
	JW666	BL21	pET20B::rha2_WT	ha2 WT ORF under T7 promoter with C-terminus 6xHis tag	this study
	JW667	BL21	pET20B::rha2_Y195A	rha2 Y195A ORF under T7 promoter with C-terminus 6xHis tag	this study
	JW530	Rosetta	pET20B::akr1c1	akr1c1 ORF under T7 promoter with N-terminus 6xHis tag	this study
	JW688	BL21	pET20B::p1-zcr	p1-zcr ORF under T7 promoter with C-terminus 6xHis tag	this study
	JW668	DH10B	pHT01::rha1_WT	rha1 WT ORF under Pgrac promoter with C-terminus VSVG tag	this study
	JW669	DH10B	pHT01::rha1_N47A	rha1 N47A ORF under Pgrac promoter with C-terminus VSVG tag	this study
	JW670	DH10B	pHT01::rha2_WT	rha2 WT ORF under Pgrac promoter with C-terminus VSVG tag	this study
	JW671	DH10B	pHT01::rha2_Y195A	rha2 Y195A ORF under Pgrac promoter with C-terminusVSVG tag	this study
	JW672	DH10B	pHT01::rha1_rha2_WT	rha1 and rha2 WT ORFs under Pgrac promoter with C-terminus VSVG tag	this study
	JW673	DH10B	pHT01::rha1_rha2_MUT	rha1 and rha2 MUT ORFs under Pgrac promoter with C-terminus VSVG tag	this study
