# Supplementary material for: 4-Hydroxy-2-nonenal antimicrobial toxicity is neutralized by an intracellular pathogen
Source: eLife. 2021 May 6;10:e59295. doi: 10.7554/eLife.59295 (PMC8174450; doi:10.7554/eLife.59295)
Supplement: Supplementary file 3. [file elife-59295-supp3.xlsx]

## Sheet: Sheet1
	primers used in this study
	Primer name	Forward/Reverse	Description	Sequence	Reference/Source
	16S_FWD	F	qRT-PCR primer for 16S Lm control	CAAGCGTTGTCCGGATTTATTG	McFarland et al, 2018
	16S_REV	R	qRT-PCR primer for 16S Lm control	GCACTCCAGTCTTCCAGTTT	McFarland et al, 2018
	rplD_FWD	F	qRT-PCR primer for rplD	CGTTCAGAAGTACGTGGTG	this study
	rplD_REV	R	qRT-PCR primer for rplD	AAGTCAAACCTTCAAGTACAACT	this study
	clpC_qPCR_F	F	qRT-PCR primer for Lm clpC	CGGTTATTGCTCGGGAAGAT	this study
	clpC_qPCR_R	R	qRT-PCR primer for Lm clpC	CCCAATGAGTACCGGGTTATT	this study
	clpE_qPCR_F	F	qRT-PCR primer for Lm clpE	CCTGTCATTGGCCGTGATAAA	this study
	clpE_qPCR_R	R	qRT-PCR primer for Lm clpE	CAACACCTGGTTCACCGATTAG	this study
	groES_qPCR_F	F	qRT-PCR primer for Lm groES	GTTCAGGTCGTGTGCTAGATAA	this study
	groES_qPCR_R	R	qRT-PCR primer for Lm groES	CGTCACTTCTGTTCCAGAGTATT	this study
	DnaK_qPCR_F	F	qRT-PCR primer for Lm DnaK	GAAACAATGGGTGGCGTTATG	this study
	DnaK_qPCR_R	R	qRT-PCR primer for Lm DnaK	ATCTACGGCTGGTTGGTTATC	this study
	103qPCR_F	F	qRT-PCR primer for Lm rha1 (lmo0103)	CCGGCAGAAGTGAAAGAACA	this study
	103qPCR_R	R	qRT-PCR primer for Lm rha1 (lmo0103)	GCCACAATCCCACCATCAATA	this study
	qPCR_lmo0613_F	F	qRT-PCR primer for Lm rha2 (lmo0613)	AATGTAACAGCGACTGGAATTTG	this study
	qPCR_lmo0613_R	R	qRT-PCR primer for Lm rha2 (lmo0613)	CGCCGACGATTGGTTTAATTG	this study
	lsdC_qPCR_F	F	qRT-PCR primer for lsdC	ATCGCAGAAGTAGAAGGTTTCC	this study
	lsdC_qPCR_R	R	qRT-PCR primer for lsdC	CGCTTTCCCATTTGCTTGTT	this study
	SrtB_qpCR_F	F	qRT-PCR primer for srtB	CACAAAGGATGCCGCTACTA	this study
	SrtB_qpCR_R	R	qRT-PCR primer for srtB	AGCCACCCAACCATATCTTTAT	this study
	103_KO_5F	F	for clean KO of rha1 (lmo0103) using SOE PCR EcoRI site underlined	GGAGGAGAATTCTGATCAAGATTCTTTGC	this study
	103_KO_intR	R	for clean KO of rha1 internal SOE	CTATTTCCTTGCCCTCTTTTAAGCAAAATAAGTCATATTTTTCTCCTCC	this study
	103_KO_intF	F	for clean KO of rha1internal SOE	GGAGGAGAAAAATATGACTTATTTTGCTTAAAAGAGGGCAAGGAAATAG	this study
	103_KO_3R	R	for clean KO of rha1 SOE PstI site underlined	GGAGGACTGCAGAATCCCCATTAC	this study
	103_genF	F	to confirm genomic disruption of rha1	CATTTGCTTCTAAACGACCTAAAGAAGTTTTACG	this study
	103_genR	R	to confirm genomic disruption of rha1	CCACGCCTTGTTTATCCAAAGCTG	this study
	613 primer A sac1 S	F	for clean KO of rha2 (lmo0613) using SOE PCR SacI site underlined	GGAGGAGAGCTCTTTGCAGTATATTTGAACGTTTTGCCAG	this study
	0613_KO_intR	R	for clean KO of rha2 internal SOE	CATCTAGCTTTTCGAAAATCTTATTTATTTGCTTTCATTTTAACTTCTCC	this study
	0613_KO_intF	F	for clean KO of rha2 internal SOE	GGAGAAGTTAAAATGAAAGCAAATAAATAAGATTTTCGAAAAGCTAGATG	this study
	613 primer D Pst1 AS	R	for clean KO of rha2 using SOE PCR PstI site underlined	GGAGGACTGCAGTTAAAACTGTCTTTTAAATCTTTCA	this study
	0613_genomic_F	F	to confirm genomic disruption of rha2	CAAAATAGTGTCAAAAGTGTTG	this study
	0613_genomic_R	R	to confirm genomic disruption of rha2	GTATTTTGCTTTTACATTGAGC	this study
	pPL2pSpc_103_F	F	to insert rha1 into pPL2-Pspac plasmid SalI site underlined	GGAGGAGTCGACAGGAGGAAAATATGACTTATGTAAATAATGATTTTGAAGAC	this study
	pPL2pSpc_103_R	R	to insert rha1 into pPL2-Pspac plasmid PstI site underlined	GGAGGACTGCAGTTAAGCAAAAGTCGTAACATCCGTAATCG	this study
	0613_BsExp_F	F	to insert rha2 into pPL2-Pspac plasmid SalI site underlined	GGCTACGTCGACAGGAGGAAAATATGAAAGCAGTAG	this study
	613_ppl2_compR	R	to insert rha2 into pPL2-Pspac plasmid PstI site underlined	GAGCTGCTGCAGTTATTTATTAAATGAAATG	this study
	103_pET20bF	F	for expression construct rha1 in pET20B NdeI site underlined	GGAGGACATATGATGACTTATGTAAATAATGATTTTGAAGACTTAATG	this study
	103_pET20bR	R	for expression construct rha1 in pET20B XhoI site underlined	GGAGGACTCGAGAGCAAAAGTCGTAACATC	this study
	0613_pET20b_F	F	for expression construct rha2 in pET20B NdeI site underlined	CGAGTTCATATGATGAAAGCAGTAGTAATCGAAAATTATGG	this study
	0613_pET20b_R	R	for expression construct rha2 in pET20B XhoI site underlined	GGTCTGCTCGAGTTTATTAAATGAAATGACTATTTTTC	this study
	103_N47A_F	F	for site directed mutagenesis of rha1 N47A	CTTCCTCTGTAGCAATGCAACCATG	this study
	103_N47A_R	R	for site directed mutagenesis of rha1 N47A	CATGGTTGCATTGCTACAGAGGAAG	this study
	SDM_613_Y195A_F	F	for site directed mutagenesis of rha2 Y195A	GCAGACCAAGTCATTGATGCAAAAGAAGTTAATTTTAAAG	this study
	SDM_613_Y195A_R	R	for site directed mutagenesis of rha2 Y195A	CTTTAAAATTAACTTCTTTTGCATCAATGACTTGGTCTGC	this study
	pHT01_103_F	F	to express rha1 in pHT01 Bs plasmid AatII site underlined	GGAGGAGACGTCATGACTTATGTAAATAATGATTTTGAAGACTTAATGAAAAACCG	this study
	pHT01_103_R	R	to express rha1 in pHT01 Bs plasmid SmaI site underlined	GGAGGACCCGGGTTACTTTCCTAATCTATTCATTTCAATATCTGTATAAGCAAAAGTCG	this study
	pHT01_613_F	F	to express rha2 in pHT01 Bs plasmid BamHI site underlined	GGAGGAGGATCCATGAAAGCAGTAGTAATCGAAAATTATGGTGGC	this study
	pHT01_613_VSVG_R	R	to express rha2 in pHT01 Bs plasmid SmaI site underlined	GGAGGACCCGGGTTACTTTCCTAATCTATTCATTTCAATATCTGTATATTTATTAAATG	this study
	103613_gibson_F	F	to express rha1 and rha2 in pHT01 Bs plasmid. Gibson assembly insertion into plasmid, SOE PCR to assemble internally. XmaI underlined	ATTAAAGGAGGAAGGATCCTCTAGAGTCGACGTCCCCGGGATGACTTATGTAAATAATGA	this study
	pHT01_103_613_intR	R	to express rha1 and rha2 in pHT01 Bs plasmid. Gibson assembly insertion into plasmid, SOE PCR to assemble internally	CGATTACTACTGCTTTCATAGAGTTTGTCCTCCTTTACTTTCCTAATCTATTCATTTC	this study
	pHT01_103_613_intF	F	to express rha1 and rha2 in pHT01 Bs plasmid. Gibson assembly insertion into plasmid, SOE PCR to assemble internally	GAAATGAATAGATTAGGAAAGTAAAGGAGGACAAACTCTATGAAAGCAGTAGTAATCG	this study
	103613_gibson_R	R	to express rha1 and rha2 in pHT01 Bs plasmid. Gibson assembly insertion into plasmid, SOE PCR to assemble internally. XmaI underlined	GACGTGAAAAAAGCCCGCTCATTAGGCGGGCTGCCCCGGGTTACTTTCCTAATCTATTCA	this study
	akr1c1_pET28b_F	F	for expression construct akr1c1 in pET28B NdeI site underlined	GAGGAGCATATGATGGATTCGAAATATCAGTGTGTGA	this study
	akr1c1_pET28b_R	R	for expression construct akr1c1 in pET28B XhoI site underlined	GAGGAGCTCGAGTTAATATTCATCAGAAAATGGATAATTAGGGG	this study
	p1-zcr_pET20B_F	F	for expression construct p1-zcr in pET20B NdeI site underlined	GGAGGACATATGATGACCGCGACCAACAAACAGGTGATTC	this study
	p1-zcr_pET20B_R	R	for expression construct p1-zcr in pET20B XhoI site underlined	GGAGGACTCGAGTTCGCGCGCCACCACC	this study
	Citations
	McFarland, A. P. et al. (2018) ‘RECON-dependent inflammation in hepatocytes enhances listeria monocytogenes cell-to-cell spread’, mBio. American Society for Microbiology, 9(3). doi: 10.1128/mBio.00526-18.
