# Supplementary material for: 4-Hydroxy-2-nonenal antimicrobial toxicity is neutralized by an intracellular pathogen
Source: eLife. 2021 May 6;10:e59295. doi: 10.7554/eLife.59295 (PMC8174450; doi:10.7554/eLife.59295)
Supplement: Supplementary file 4. [file elife-59295-supp4.xlsx]

## Sheet: Sheet1
	DNA coding sequences used for protein expression and trans complementation in this study (ORFs)
	gfp	ATGAGTAAAGGAGAAGAACTTTTCACTGGAGTTGTCCCAATTCTTGTTGAATTAGATGGTGATGTTAATGGGCACAAATTTTCTGTCAGTGGAGAGGGTGAAGGTGATGCAACATACGGAAAACTTACCCTTAAATTTATTTGCACTACTGGAAAACTACCTGTTCCATGGCCAACACTTGTCACTACTTTCGCGTATGGTCTTCAATGCTTTGCGAGATACCCAGATCATATGAAACAGCATGACTTTTTCAAGAGTGCCATGCCCGAAGGTTATGTACAGGAAAGAACTATATTTTTCAAAGATGACGGGAACTACAAGACACGTGCTGAAGTCAAGTTTGAAGGTGATACCCTTGTTAATAGAATCGAGTTAAAAGGTATTGATTTTAAAGAAGAT…
	rha1-WT	ATGACTTATGTAAATAATGATTTTGAAGACTTAATGAAAAACCGCCGCTCGATTCGAGAATACGATGAAACGGTGAAAATTAGCCAAGAAGAAATGAAAGCTATTCTAGAGGACGCGGTAACGGCTCCTTCCTCTGTAAACATGCAACCATGGCGTTTTGTGGTCGTGGAAAGTGATGCGGGTAAAGAAAAATTAAGCTCGTTAGTTCGCTTTAATACACGTCAAAATGAATCTTCTTCCGCGATGATTTTAGTTTTTGGCGACTTAGAGAATTTTGAAAACGGTGAAAAAATTTACGGAGAATCAGTTGAACGGGGCTTGATGCCGGCAGAAGTGAAAGAACAACAAATGGCTAAATTAAGCCAGTACTTTGCTTCCATTCCACGCTCAGAAGCTGAA…
	rha1-N47A	ATGACTTATGTAAATAATGATTTTGAAGACTTAATGAAAAACCGCCGCTCGATTCGAGAATACGATGAAACGGTGAAAATTAGCCAAGAAGAAATGAAAGCTATTCTAGAGGACGCGGTAACGGCTCCTTCCTCTGTAgcaATGCAACCATGGCGTTTTGTGGTCGTGGAAAGTGATGCGGGTAAAGAAAAATTAAGCTCGTTAGTTCGCTTTAATACACGTCAAAATGAATCTTCTTCCGCGATGATTTTAGTTTTTGGCGACTTAGAGAATTTTGAAAACGGTGAAAAAATTTACGGAGAATCAGTTGAACGGGGCTTGATGCCGGCAGAAGTGAAAGAACAACAAATGGCTAAATTAAGCCAGTACTTTGCTTCCATTCCACGCTCAGAAGCTGAA…
	rha2-WT	ATGAAAGCAGTAGTAATCGAAAATTATGGTGGCAAAGAAGAATTAAAAGAAAAAGAAGTTGCAATGCCAAAAGCGGGAAAAAATCAAGTGATTGTAAAAGAAGCAGCAACATCGATTAACCCGATTGATTGGAAACTTCGTGAAGGATATTTAAAACAAATGATGGACTGGGAATTCCCGATTATTTTAGGCTGGGACGTAGCGGGTGTTATTTCAGAAGTTGGTGAAGGCGTTACAGATTGGAAAGTCGGGGATGAAGTATTTGCTCGCCCTGAAACAACGCGTTTTGGTACGTATGCTGAGTATACAGCGGTAGATGATCACTTACTTGTACCACTTCCAGAAGGTATTAGTTTTGATGAAGCAGCATCGATTCCACTTGCAGGCTTAACTGCATGG…
	rha2-Y195A	ATGAAAGCAGTAGTAATCGAAAATTATGGTGGCAAAGAAGAATTAAAAGAAAAAGAAGTTGCAATGCCAAAAGCGGGAAAAAATCAAGTGATTGTAAAAGAAGCAGCAACATCGATTAACCCGATTGATTGGAAACTTCGTGAAGGATATTTAAAACAAATGATGGACTGGGAATTCCCGATTATTTTAGGCTGGGACGTAGCGGGTGTTATTTCAGAAGTTGGTGAAGGCGTTACAGATTGGAAAGTCGGGGATGAAGTATTTGCTCGCCCTGAAACAACGCGTTTTGGTACGTATGCTGAGTATACAGCGGTAGATGATCACTTACTTGTACCACTTCCAGAAGGTATTAGTTTTGATGAAGCAGCATCGATTCCACTTGCAGGCTTAACTGCATGG…
	akr1c1	ATGGATTCGAAATATCAGTGTGTGAAGCTGAATGATGGTCACTTCATGCCTGTCCTGGGATTTGGCACCTATGCGCCTGCAGAGGTTCCTAAAAGTAAAGCTTTAGAGGCCACCAAATTGGCAATTGAAGCTGGCTTCCGCCATATTGATTCTGCTCATTTATACAATAATGAGGAGCAGGTTGGACTGGCCATCCGAAGCAAGATTGCAGATGGCAGTGTGAAGAGAGAAGACATATTCTACACTTCAAAGCTTTGGTGCAATTCCCATCGACCAGAGTTGGTCCGACCAGCCTTGGAAAGGTCACTGAAAAATCTTCAATTGGATTATGTTGACCTCTACCTTATTCATTTTCCAGTGTCTGTAAAGCCAGGTGAGGAAGTGATCCCAAAAGATGAA…
	p1-zcr	ATGACCGCGACCAACAAACAGGTGATTCTGAAAGATTATGTGAGCGGCTTTCCGACCGAAAGCGATTTTGATTTTACCACCACCACCGTGGAACTGCGCGTGCCGGAAGGCACCAACAGCGTGCTGGTGAAAAACCTGTATCTGAGCTGCGATCCGTATATGCGCATTCGCATGGGCAAACCGGATCCGAGCACCGCGGCGCTGGCGCAGGCGTATACCCCGGGCCAGCCGATTCAGGGCTATGGCGTGAGCCGCATTATTGAAAGCGGCCATCCGGATTATAAAAAAGGCGATCTGCTGTGGGGCATTGTGGCGTGGGAAGAATATAGCGTGATTACCCCGATGACCCATGCGCATTTTAAAATTCAGCATACCGATGTGCCGCTGAGCTATTATACC…
